# Supplementary material for: Vanadium nitride@N-doped carbon nanocomposites: tuning of pore structure and particle size through salt templating and its influence on supercapacitance in ionic liquid media
Source: Royal Society of Chemistry journal article supplement (doi:10.1039/c4ra03461a), 2014-01-01
Supplement: c4ra03461a1.pdf [file c4ra03461a1.pdf]

## **Vanadium nitride@N-doped carbon nanocomposites: Tuning of pore structure and particle size through salt templating and its influence on supercapacitance in ionic liquid media**

Nina Fechler,<sup>\*a</sup> Girum Ayalneh Tiruye,<sup>b</sup> Rebeca Marcilla,<sup>b</sup> and Markus Antonietti<sup>a</sup>

<sup>a</sup> Max Planck Institute of Colloids and Interfaces, Colloid Chemistry, Research Campus Golm, Am Mühlenberg 1, 14476 Potsdam (Germany)

<sup>b</sup> IMDEA Energy Institute, Avda. Ramón de la Sagra 3, 28935 Móstoles, Madrid (Spain)

## **Supporting Information**

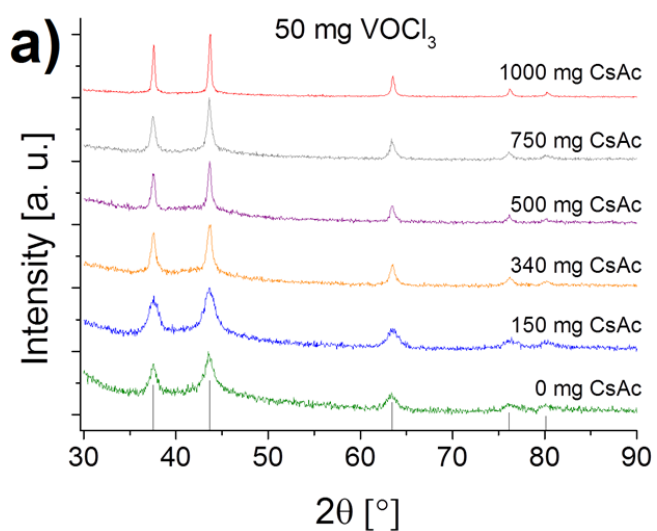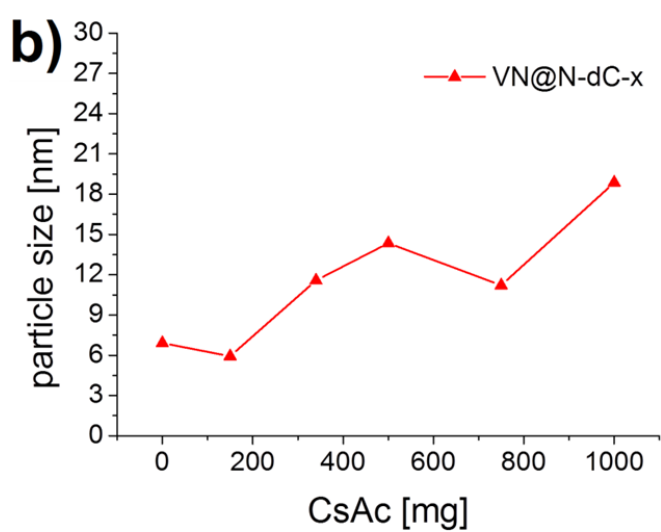

**Figure SI-1 a)** WAXS patterns of calcined, washed  $\text{VN@N-dC-x-CsAc-VOCl}_3$  (Ref. pattern ICDD 00-035-0768) and **b)** calculated particle size using Scherrer equation at different CsAc concentrations.

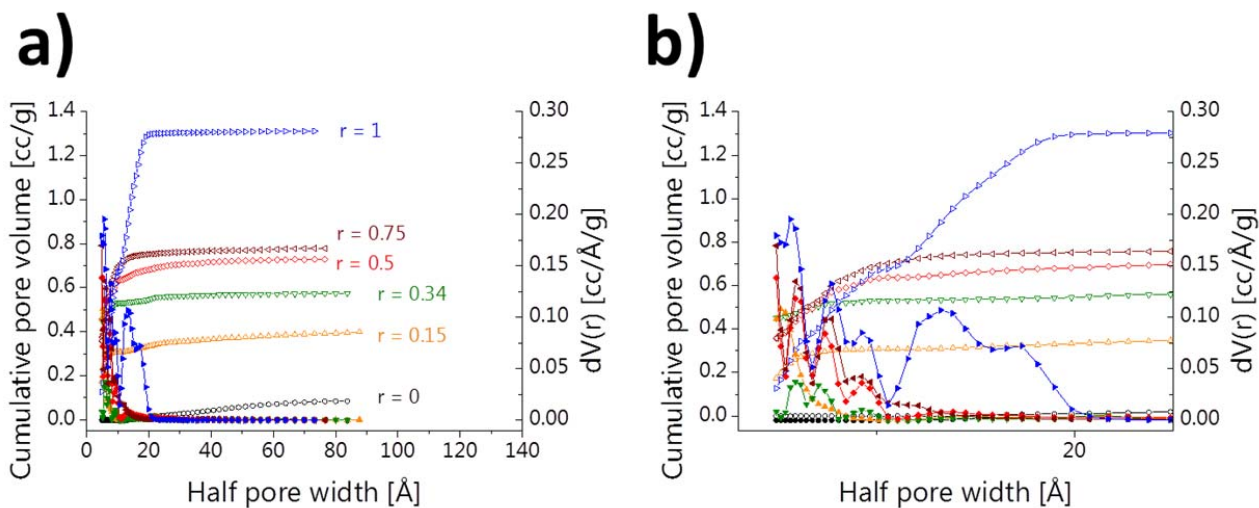

Figure SI-2 a) PSDs of VN@N-dC-x-CsAc-VOCl<sub>3</sub>, b) magnification.

Table SI-1 Composition of the composites VN@N-dC-x-CsAc-VOCl<sub>3</sub>.

| CsAc<br>[mg] | Element [wt%]      |       |       |         |       |
|--------------|--------------------|-------|-------|---------|-------|
|              | Elemental analysis |       |       | ICP OES | XPS   |
|              | N                  | C     | H     | V       | O     |
| 0            | 12.29              | 68.69 | 1.038 | 7.0     | 8.40  |
| 150          | 7.61               | 69.94 | 1.79  | -       |       |
| 340          | 7.60               | 68.55 | 1.58  | 5.6     | 10.64 |
| 500          | 5.95               | 65.39 | 2.78  | -       |       |
| 750          | 6.96               | 60.09 | 1.05  | -       |       |
| 1000         | 11.18              | 61.63 | 0.90  | 7.8     | 5.42  |

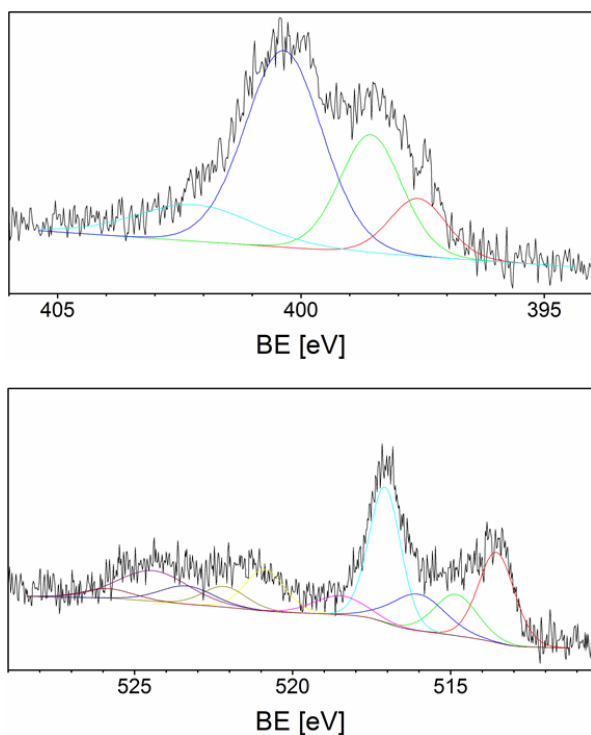

**Figure SI-3** XPS-spectra: N1s (**top**) and V2p (**bottom**) orbitals of VN@N-dC-340-CsAc-VOC<sub>13</sub>.

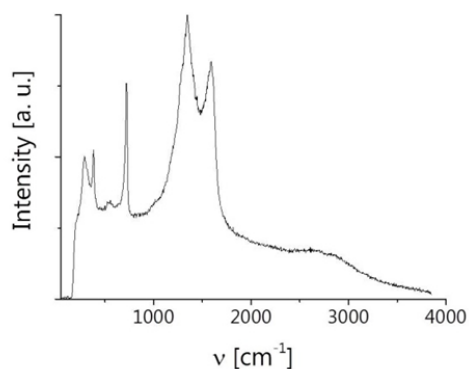

**Figure SI-4** Raman-spectrum of VN@N-dC-340-CsAc-VOC<sub>13</sub>.

Raman spectroscopy revealed the presence of  $V_xO_y$  (Fig. SI-6),<sup>[SI-1]</sup> which can be attributed to a thin oxide layer on the vanadium nitride nanoparticles, since it is a surface sensitive measurement method and no vanadium oxide phase could be detected in the respective WAXS pattern. As speculated in our previous work,<sup>[23]</sup> an additional signal enhancement due to plasmon resonances on the surface of VN can be considered. Furthermore, the D- and G-bands are visible and are characteristic for slightly disordered and heteroatom-doped carbon<sup>[SI-2]</sup> with an intensity ratio of  $I_D/I_G > 1$  suggesting the incorporation of nitrogen within the carbon matrix.

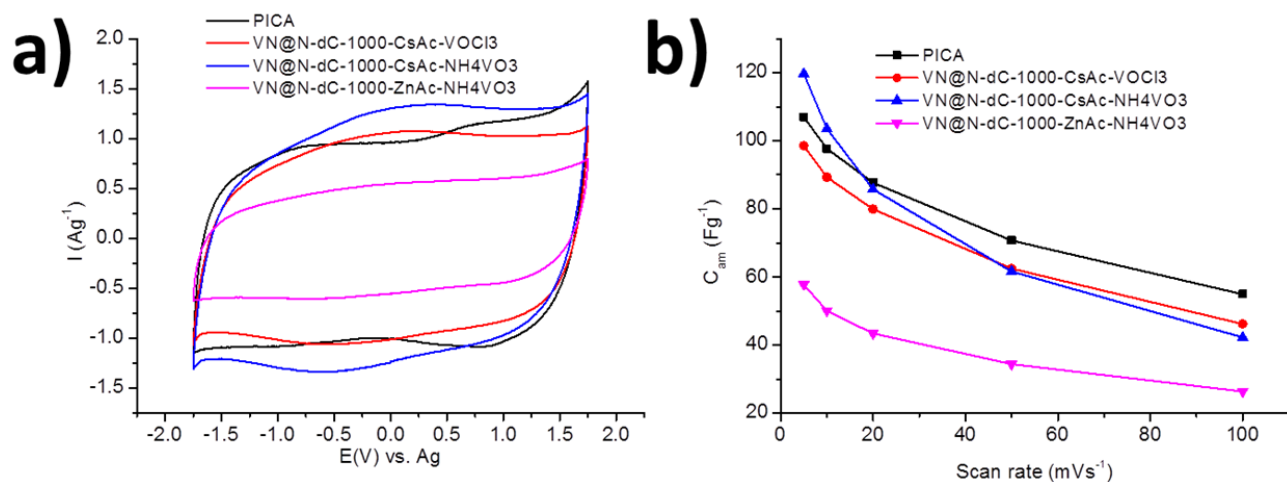

**Figure SI-5 a)** CVs of VN@N-dC-1000-CsAc-VOCl<sub>3</sub> (red), VN@N-dC-1000-CsAc-NH<sub>4</sub>VO<sub>3</sub> (blue), VN@N-dC-1000-ZnAc-NH<sub>4</sub>VO<sub>3</sub> (pink) and Pica (black) from -1.75 to 1.75 V at 10mV s<sup>-1</sup> scan rate. **b)** Specific capacitances vs. the scan rate calculated from CVs performed from -1.75 to 1.75 V. Measurements were conducted at 60 °C in 3-electrode setup in PYR<sub>14</sub>TFSI.

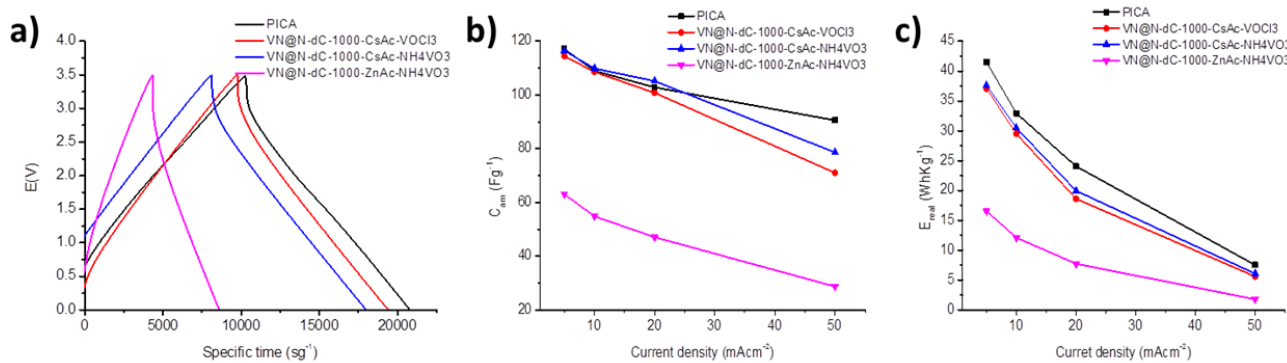

**Figure SI-6 a)** Galvanostatic charge-discharge profiles of VN@N-dC-1000-CsAc-VOCl<sub>3</sub> (red), VN@N-dC-1000-CsAc-NH<sub>4</sub>VO<sub>3</sub> (blue), VN@N-dC-1000-ZnAc-NH<sub>4</sub>VO<sub>3</sub> (pink) and Pica (black) carbon cycled from 0 V to 3.5 V at 10 mAcm<sup>-2</sup>. Due to different weights of active material per supercapacitor, the discharge time has been referred to the total active mass. **b)** Specific capacitances ( $C_{am}$ ) and **c)** specific real energy ( $E_{real}$ ) vs. current density calculated from charge-discharge experiments. Measurements were conducted at 60 °C in 2-electrode setup in PYR<sub>14</sub>TFSI.

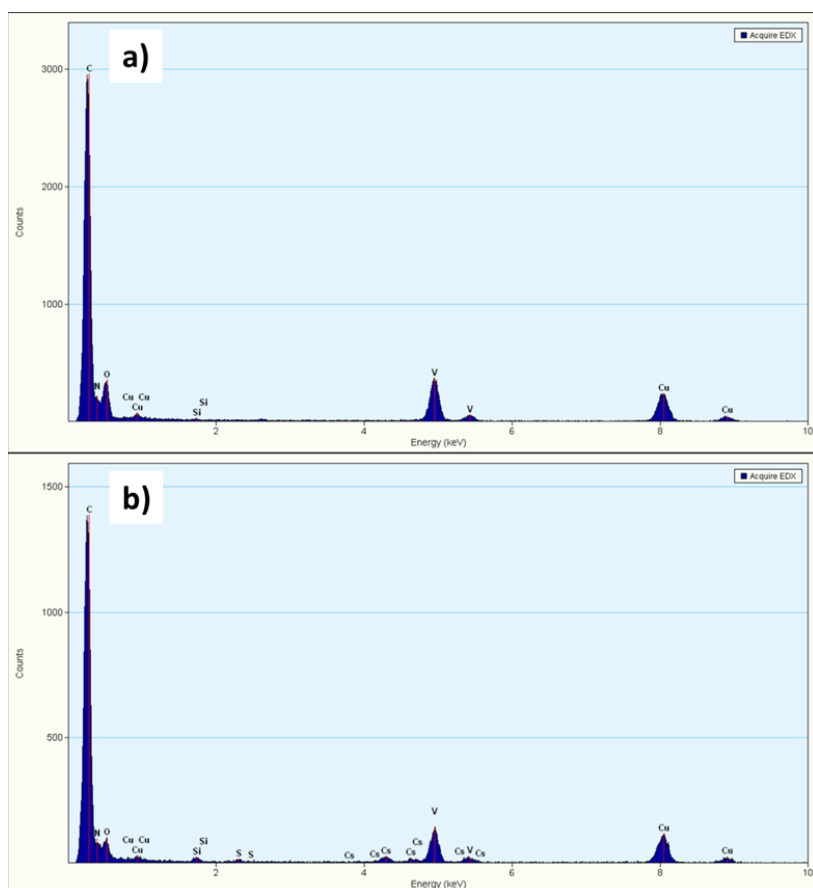

**Figure SI-7** a) Energy-dispersive X-ray spectroscopy of VN@N-dC-0-CsAc-NH<sub>4</sub>VO<sub>3</sub> and b) VN@N-dC-1000-CsAc-NH<sub>4</sub>VO<sub>3</sub>.

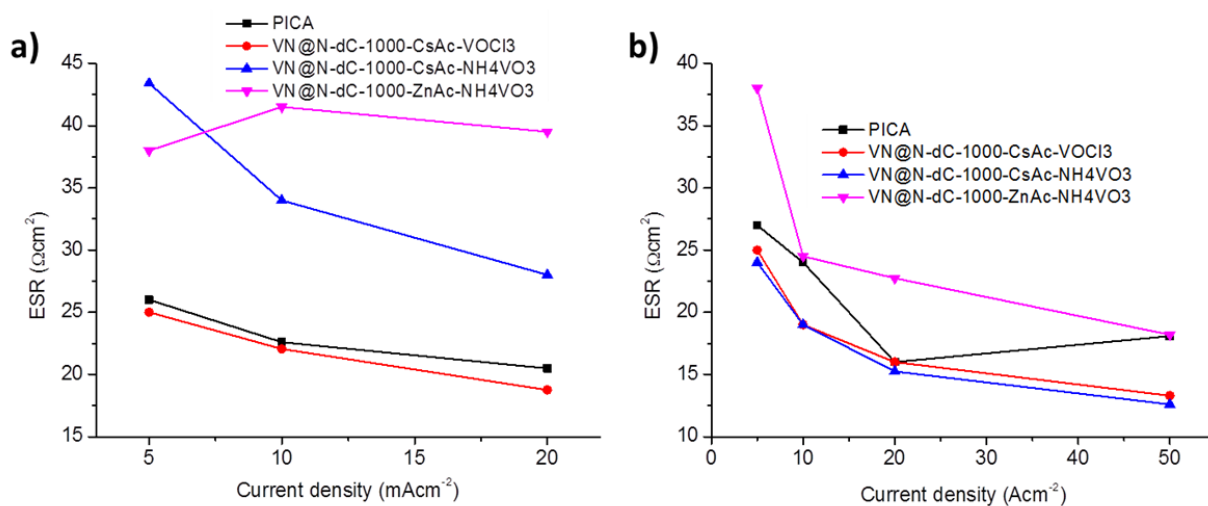

**Figure SI-8** Equivalent series resistance (ESR) of the PICA (black) and composites obtained by CD experiments (from 0 V to 3.5 V at different current densities) in a) PYR<sub>14</sub>FSI and b) PYR<sub>14</sub>TFSI electrolytes.

[SI-1] C. M. Ghimbeu, E. Raymundo-Pinero, P. Fioux, F. Beguin, C. Vix-Guterl, *Journal of Materials Chemistry* **2011**, 21, 13268.

[SI-2] J. P. Paraknowitsch, A. Thomas, M. Antonietti, *Journal of Materials Chemistry* **2010**, 20, 6746.
